# Supplementary material for: Synthesis of molecular brushes by telomerization
Source: Royal Society of Chemistry journal article supplement (doi:10.1039/c7py00875a), 2017-01-01
Supplement: c7py00875a1.pdf [file c7py00875a1.pdf]

## Synthesis of molecular brushes by telomerization

Coralie Teulère and Renaud Nicolay\*

Matière Molle et Chimie, École Supérieure de Physique et de Chimie Industrielles de la Ville de Paris (ESPCI)–CNRS, UMR-7167, Paris Sciences et Lettres (PSL) Research University, 10 rue Vauquelin, 75005 Paris, France.

\* Corresponding author: email [renaud.nicolay@espci.fr](mailto:renaud.nicolay@espci.fr)

### Supporting Information

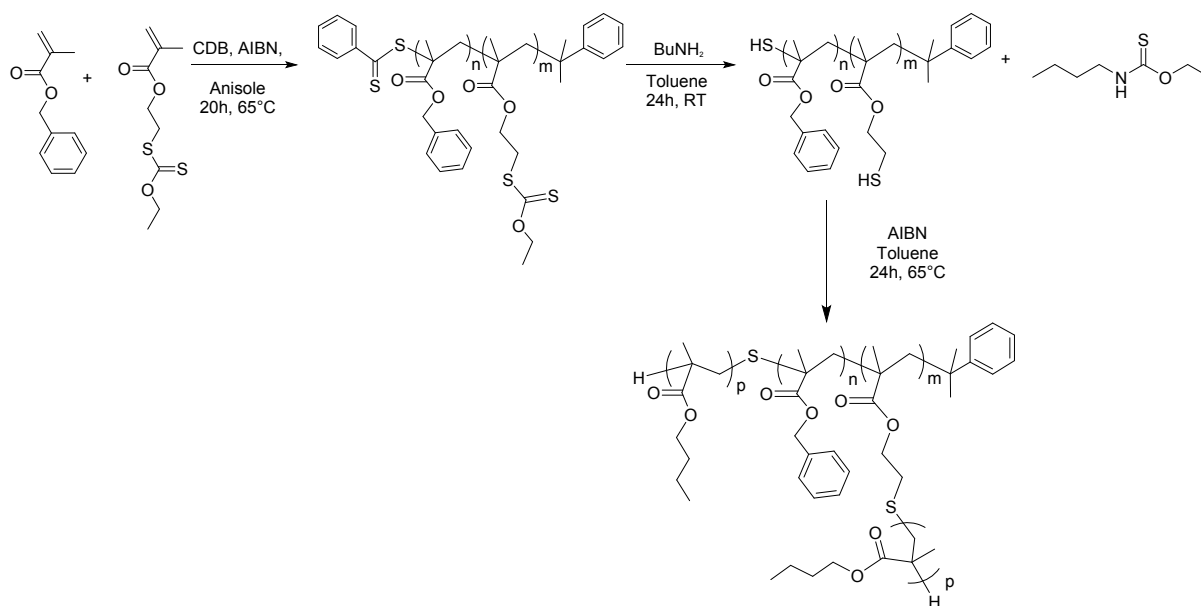

**Scheme S1** : Synthesis of PBMA brushes by telomerization via a two-pot two-step aminolysis and side-chain growth sequence

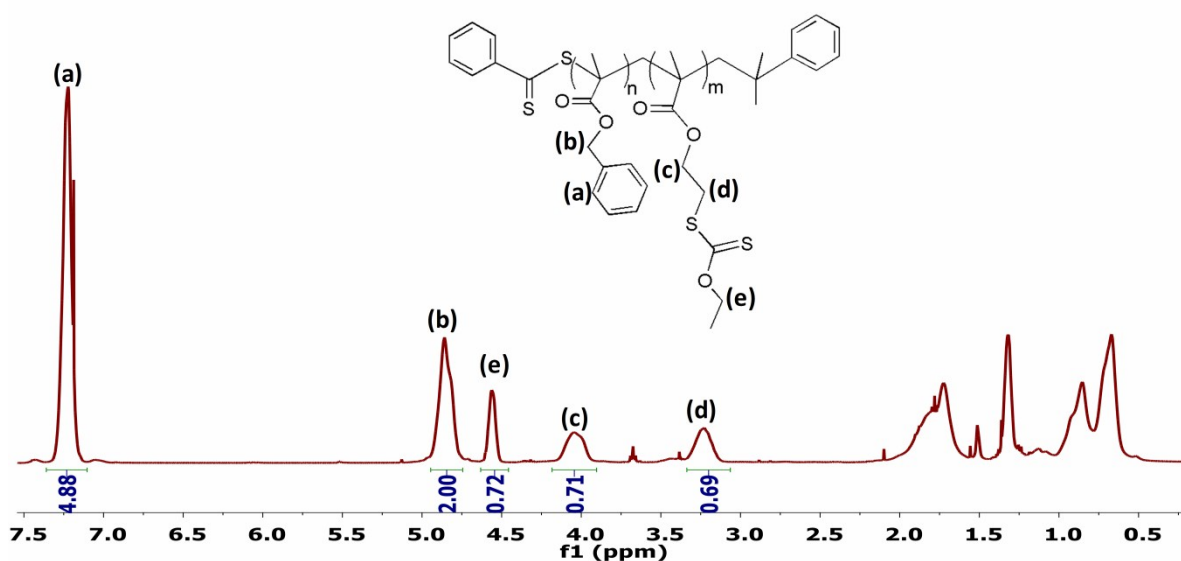

**Figure S1:**  $^1\text{H}$  NMR spectrum of polymer **P1**. Experimental conditions:  $[\text{BenzMA}]_0/[\text{XEMA}]_0/[\text{CDB}]_0/[\text{AIBN}]_0 = 2.3/1/0.02/0.002$  in anisole 40 vol%, 20 h at 65 °C

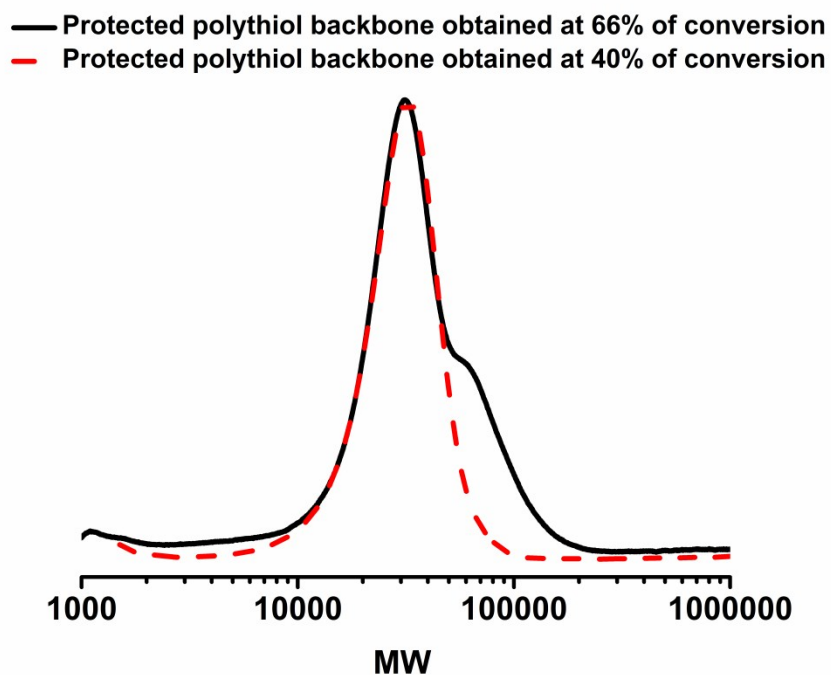

**Figure S2:** SEC traces of protected polythiol backbones. Black solid line experimental conditions:  $[\text{BenzMA}]_0/[\text{XEMA}]_0/[\text{CDB}]_0/[\text{AIBN}]_0 = 2.3/1/0.02/0.002$  in anisole 40 vol%, 20 h at 65 °C; monomer conversion = 66%. Red dashed line experimental conditions:  $[\text{BenzMA}]_0/[\text{XEMA}]_0/[\text{CDB}]_0/[\text{AIBN}]_0 = 2.3/1/0.013/0.0013$  in anisole 40 vol%, 20 h at 65 °C ; monomer conversion = 40%.

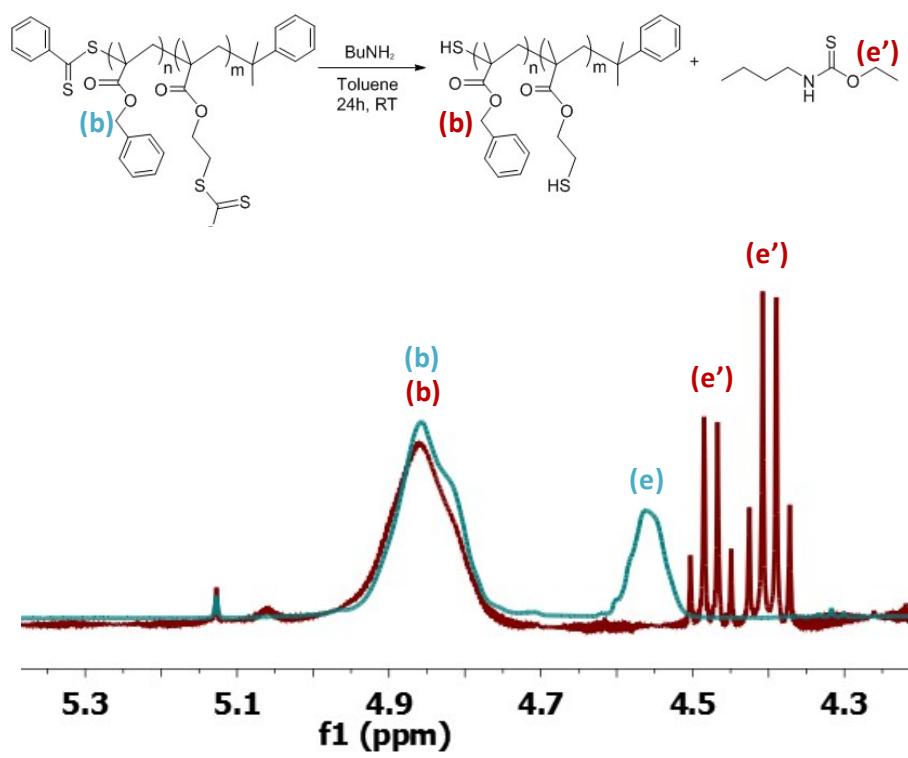

**Figure S3:**  $^1\text{H}$  NMR spectra before (blue) and after (red) polythiol deprotection

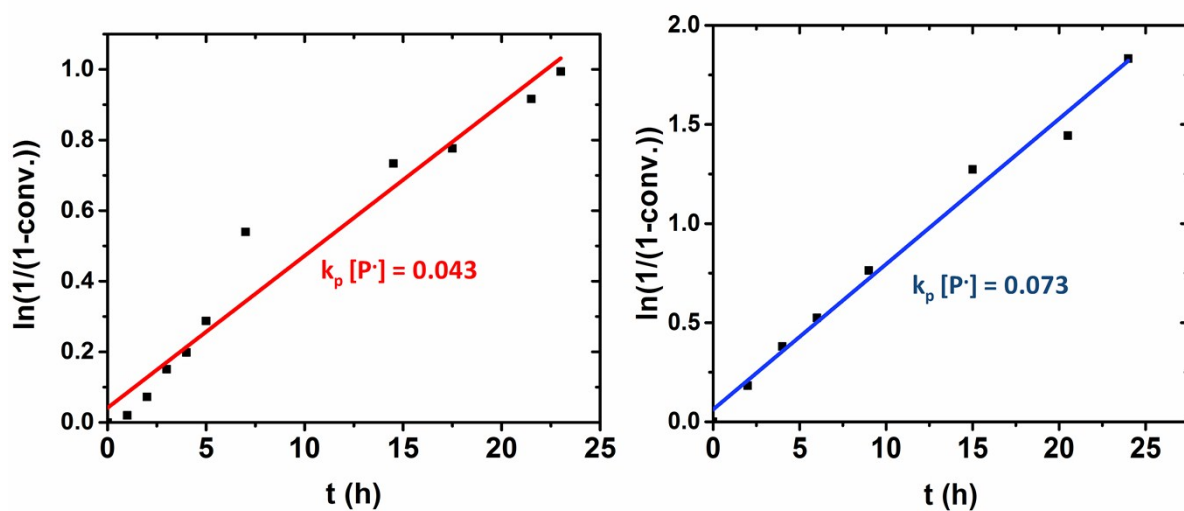

**Figure S4:** Kinetic plot for (a) **P5** polymerization in 50 % toluene solution at 65 °C with a ratio of  $[\text{BMA}]_0/[\text{SH}]_0/[\text{AIBN}]_0 = 60/1/0.01$  and (b) **P7** polymerization in 50 % toluene solution at 65 °C with a ratio of  $[\text{BMA}]_0/[\text{SH}]_0/[\text{AIBN}]_0 = 40/1/0.01$

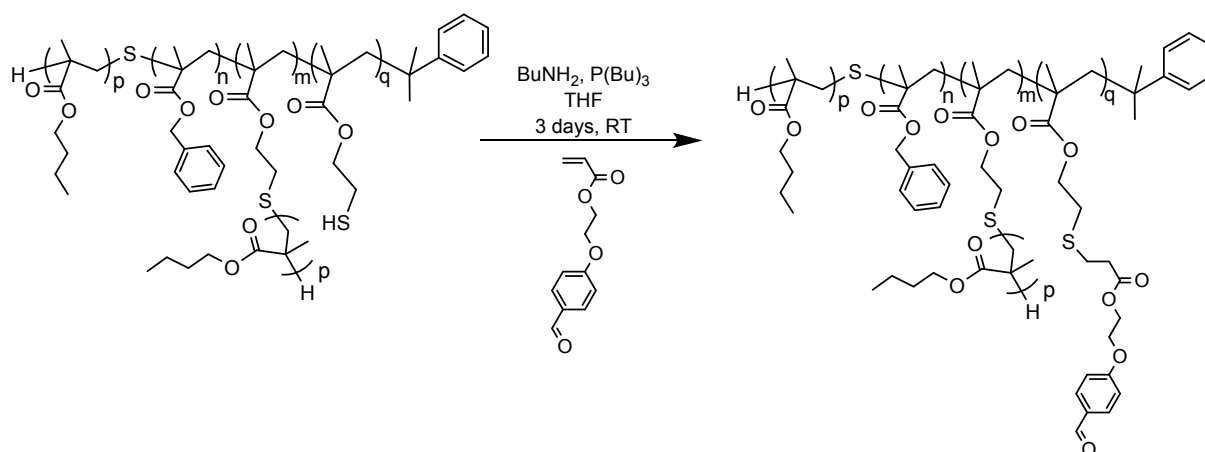

**Scheme S2:** General procedure for thiol titration on bottlebrush polymers

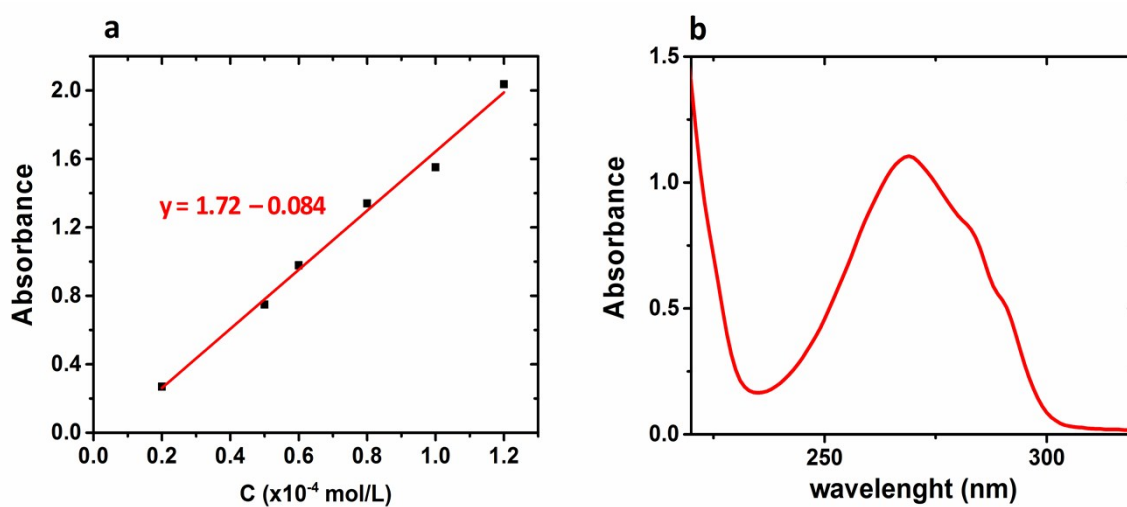

**Figure S5:** (a) Calibration curve of 4-(2-acryloxyethoxy)benzaldehyde at 270 nm –  $\epsilon = 17\,200\text{ M}^{-1}\cdot\text{cm}^{-1}$  (b) UV spectrum of polythiol **P1** after deprotection and functionalization with 4-(2-acryloxyethoxy)benzaldehyde.

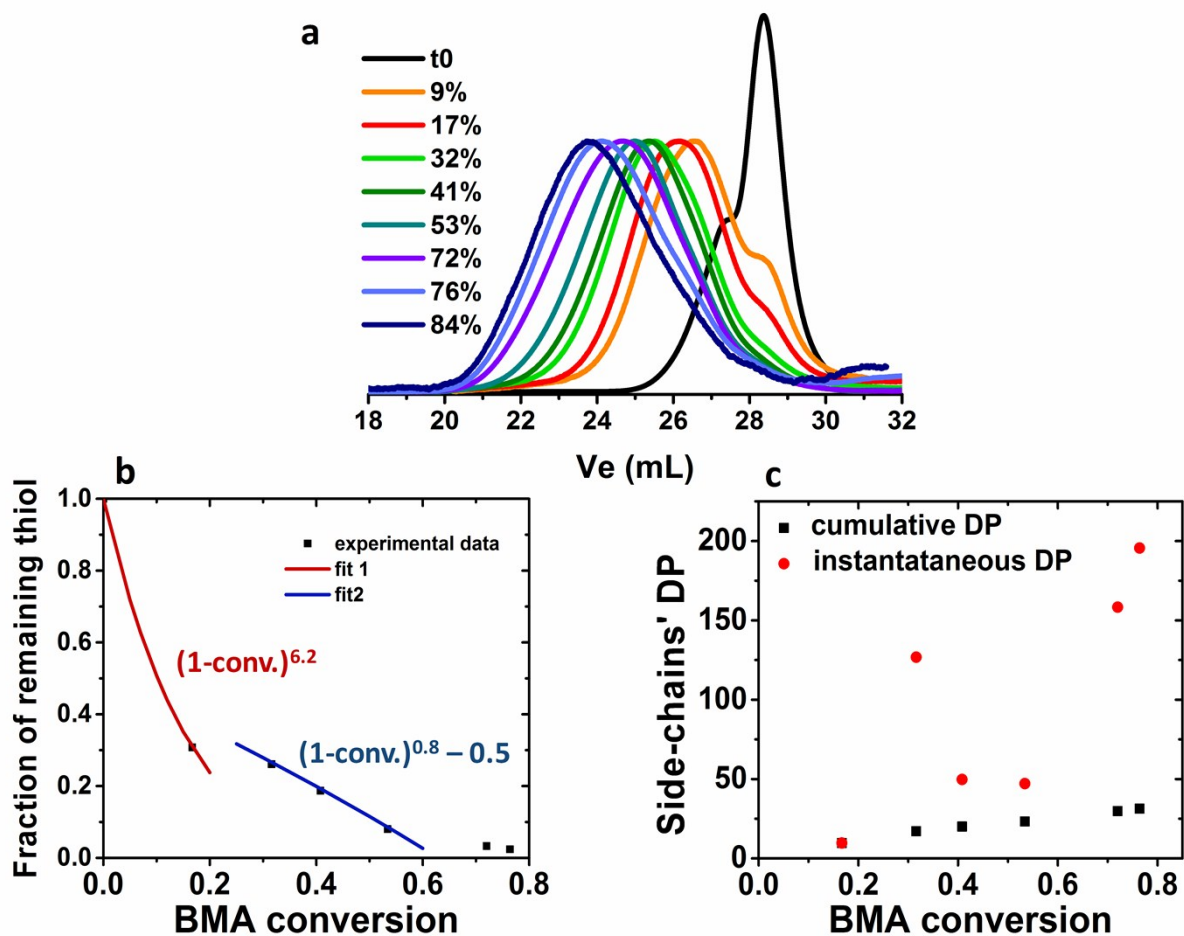

**Figure S6:** (a) Evolution of SEC traces of the crude reaction medium during the synthesis of brush **P7**. Polymerization conditions:  $[\text{BMA}]_0/[\text{SH}]_0/[\text{AIBN}]_0 = 40/1/0.01$  in toluene 50 vol%, 24 h at 65 °C. (b) Plot of the remaining fraction of thiol vs BMA conversion during the synthesis of brush **P7** (c) Plot of side-chains cumulated DP (black squares)  $([\text{M}]_0 - [\text{M}]_t)/([\text{S}]_0 - [\text{S}]_t)$  and instantaneous DP (red circles)  $([\text{M}]_{t-1} - [\text{M}]_t)/([\text{S}]_{t-1} - [\text{S}]_t)$  vs BMA conversion during the synthesis of brush **P7**.

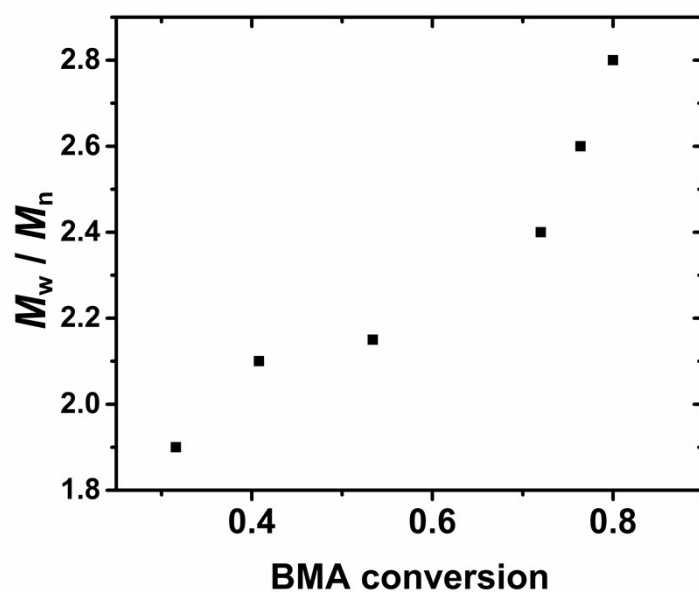

**Figure S7:** Plot of  $M_w/M_n$  vs conversion during brush **P7** polymerization. Polymerization conditions:  $[\text{BMA}]_0/[\text{SH}]_0/[\text{AIBN}]_0 = 40/1/0.01$  in toluene 50 vol%, 24 h at 65 °C.

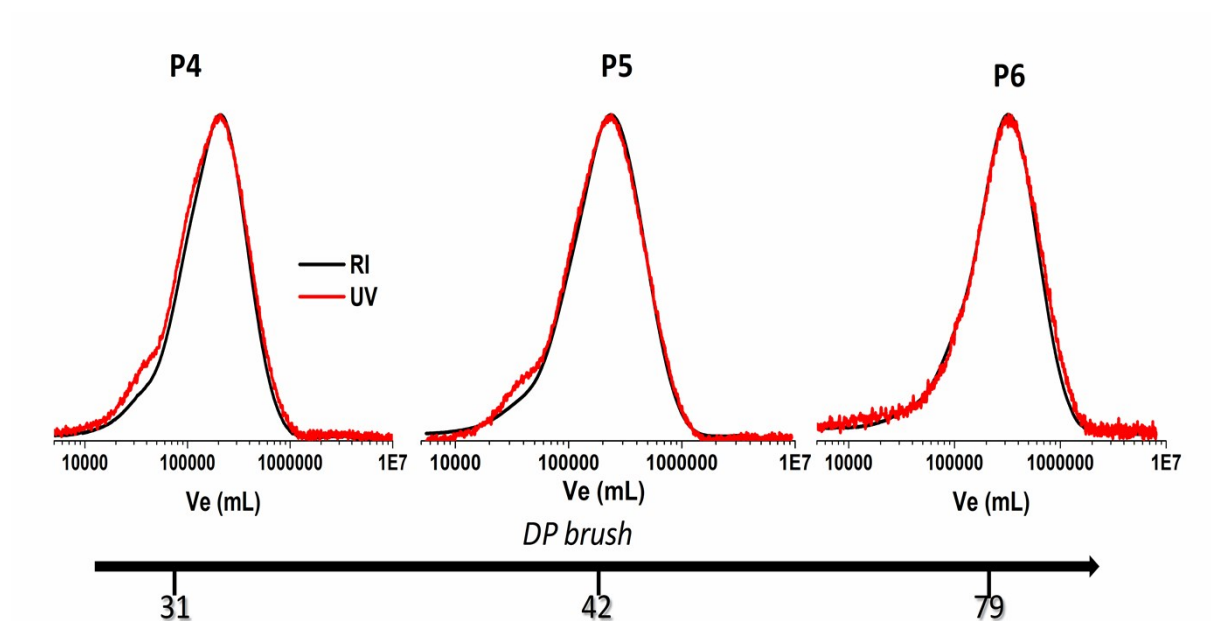

**Figure S8:** SEC traces of the crude reaction media at the end of the syntheses of brushes with different side-chain lengths.

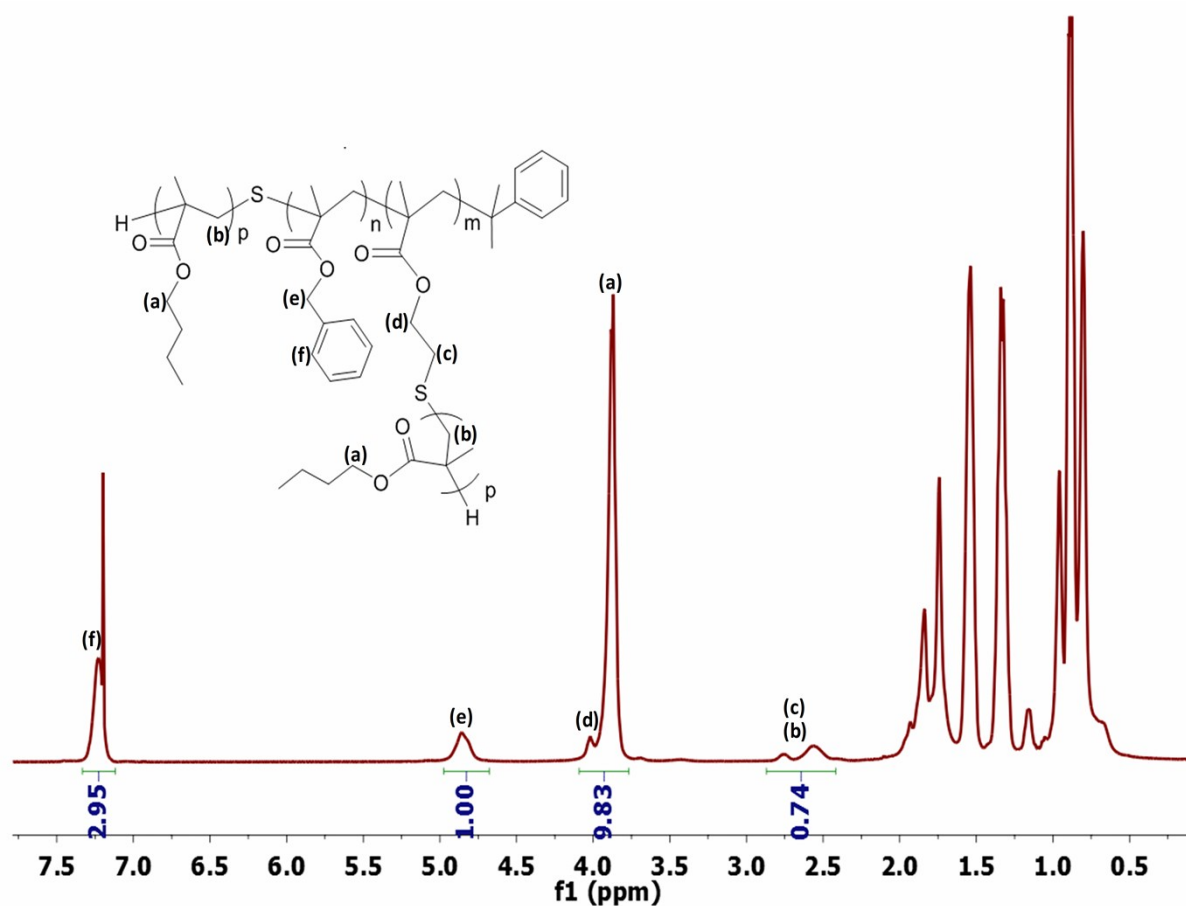

**Figure S9:**  $^1\text{H}$  NMR spectrum of bottlebrush polymer **P4**. Polymerization conditions:  $[\text{BMA}]_0/[\text{SH}]_0/[\text{AIBN}]_0 = 40/1/0.01$  in toluene 50 vol%, 24 h at 65 °C.

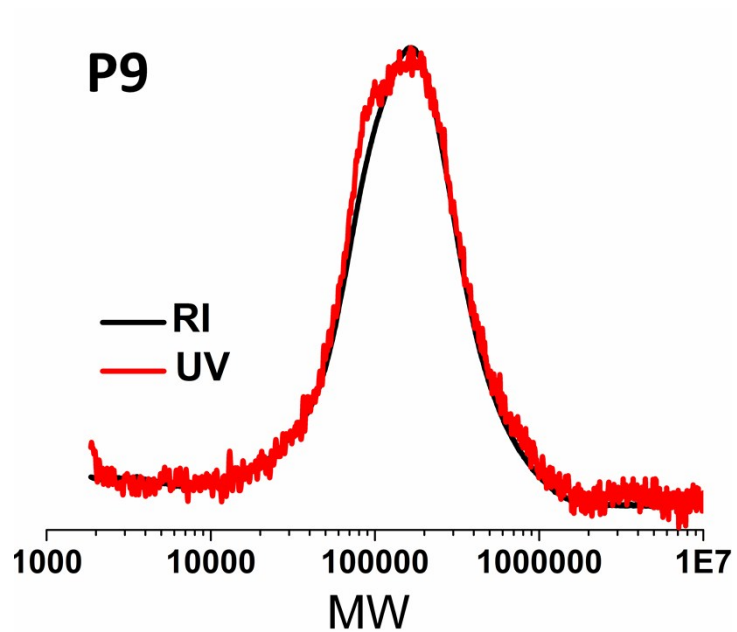

**Figure S10:** SEC traces of brush **P9** synthesized via a two-step process. Experimental conditions:  $[\text{NIPAM}]_0/[\text{SH}]_0/[\text{AIBN}]_0 = 40/1/0.01$  in DMF 50 vol%, 1 h30 at 65 °C. SEC traces of the crude reaction medium.
